# Supplementary material for: The Opposing Effect of Type I IFN on the T Cell Response by Non-modified mRNA-Lipoplex Vaccines Is Determined by the Route of Administration
Source: PubMed Central journal article supplement — Mol Ther Nucleic Acids. 2020 Sep 11;22:373–81. doi: 10.1016/j.omtn.2020.09.004 (PMC7533292; doi:10.1016/j.omtn.2020.09.004), 2020-09-11
Supplement: mmc1.pdf [file mmc1.pdf]

**OMTN, Volume 22**

## **Supplemental Information**

### **The Opposing Effect of Type I IFN on the T Cell Response by Non-modified mRNA-Lipoplex Vaccines Is Determined by the Route of Administration**

**Lien Van Hoecke, Kenny Roose, Marlies Ballegeer, Zifu Zhong, Niek N. Sanders, Stefaan De Koker, Xavier Saelens, and Sandra Van Lint**

**Figure S1. T cell response upon s.c. delivery of mRNA-lipoplexes.** Wild type, CD11c-Cre<sup>+/-</sup>IFNAR<sup>fl/fl</sup> mice and CD4-Cre<sup>+/-</sup>IFNAR<sup>fl/fl</sup> mice were immunized s.c. with 10 µg CleanCap OVA mRNA-lipoplexes (DOTAP/DOPE or RNAiMAX). Two weeks after the last immunization the induced T cell responses were determined. Spleens were isolated and the splenocytes were stimulated *in vitro* with OVA peptide for 16h. **(A)** The number of OVA-specific IFN-γ-secreting splenocytes was determined by enzyme linked immunosorbent spot (ELISpot). Data represent individual mice and the mean (n = 6 mice per group). **(B)** A mixture of CFSE-labeled cells pulsed with control (CFSE<sup>low</sup>) or OVA peptide (CFSE<sup>high</sup>) were adoptively transferred in a 1:1 ratio to mRNA-lipoplex immunized mice (s.c. route). Specific killing was analyzed 2 days later by flow cytometry. (n = 6 mice per group). Statistical analyses on data sets were performed by one-way ANOVA followed by Tukey's post hoc test. (ns, non significant; \*\*, p < 0.01 ; \*\*\*\*, p < 0.0001).

**Figure S2. T cell response upon i.v. delivery of mRNA-lipoplexes.** Wild type mice, CD11c-Cre<sup>+/-</sup>IFNAR<sup>fl/fl</sup> mice and CD4-Cre<sup>+/-</sup>IFNAR<sup>fl/fl</sup> mice were immunized i.v. with 10 µg OVA mRNA-lipoplexes (DOTAP/DOPE or RNAiMAX). Two weeks after the last immunization the induced T cell responses were determined. Spleens were isolated and the splenocytes were stimulated *in vitro* with OVA peptide for 16h. **(A)** The number of OVA-specific IFN-γ-secreting splenocytes was determined by an ELISpot. Data represent individual mice and the mean (n = 6 mice per group). **(B)** A mixture of CFSE-labeled cells pulsed with control (CFSE<sup>low</sup>) or OVA peptide (CFSE<sup>high</sup>) were adoptively transferred in a 1:1 ratio to mRNA-lipoplex immunized mice (i.v. route). Specific killing was measured 2 days later by flow cytometry. Data represent individual mice and the mean (n = 6 mice per group). Statistical analyses on data sets were performed by one-way ANOVA followed by Tukey's post hoc test. (ns, non-significant; \*, p < 0.05).

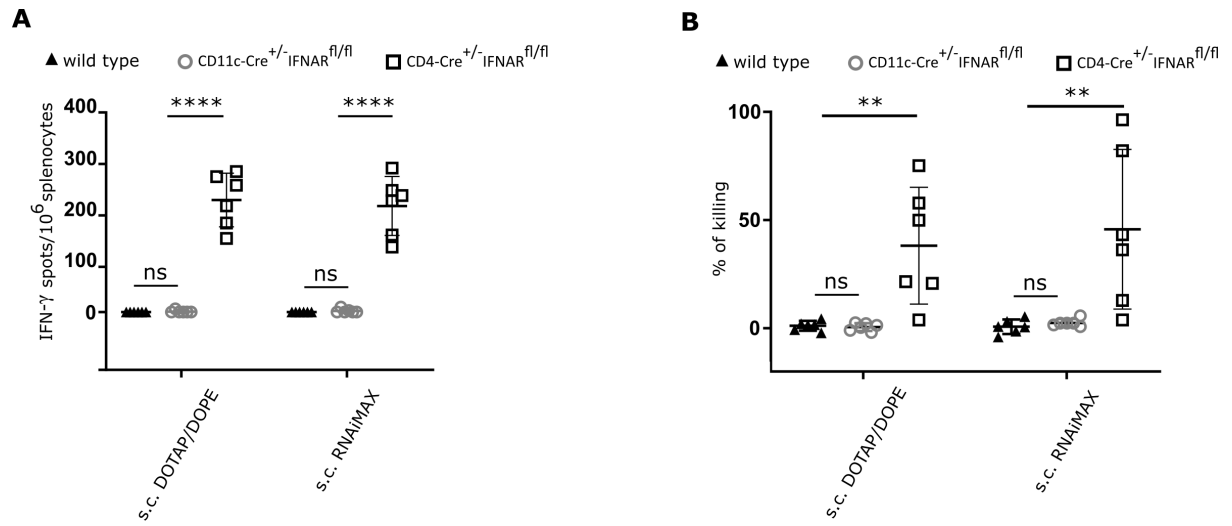

**Figure S1. T cell response upon s.c. delivery of mRNA-lipoplexes.**

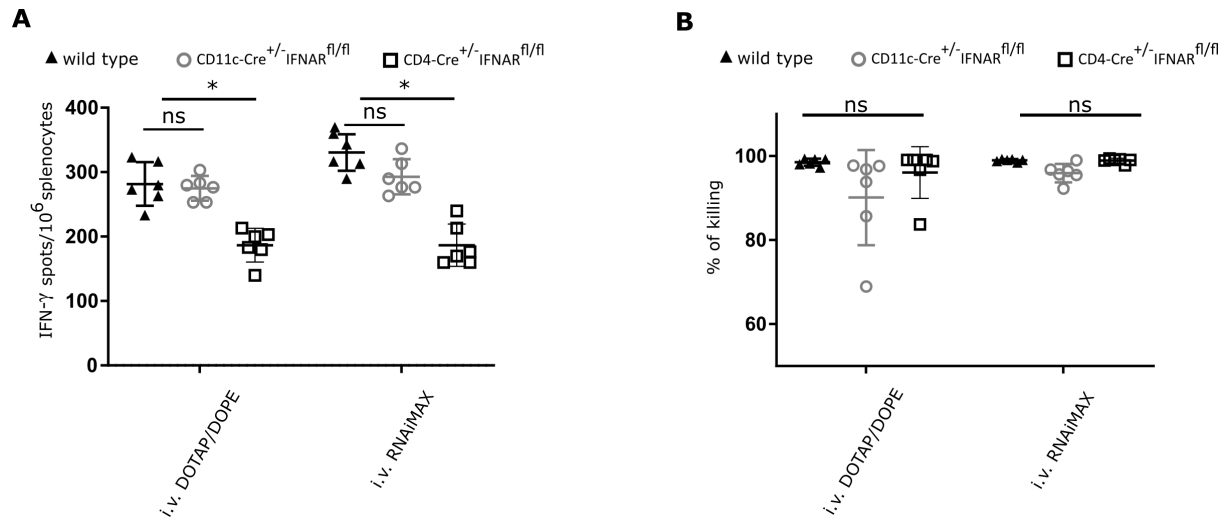

**Figure S2. T cell response upon i.v. delivery of mRNA-lipoplexes.**
